# Supplementary material for: Fragments as Novel Starting Points for tRNA‐Guanine Transglycosylase Inhibitors Found by Alternative Screening Strategies
Source: PubMed Central journal article supplement — ChemMedChem. 2020 Jan 29;15(3):324–37. doi: 10.1002/cmdc.201900604 (PMC7687107; doi:10.1002/cmdc.201900604), 2020-01-29
Supplement: CMDC-15-324-s001.pdf [file CMDC-15-324-s001.pdf]

**CHEM**MED**CHEM**

Supporting Information

**Fragments as Novel Starting Points for tRNA-Guanine  
Transglycosylase Inhibitors Found by Alternative Screening  
Strategies**

Engi Hassaan, Per-Olof Eriksson, Stefan Geschwindner, Andreas Heine, and Gerhard Klebe\*

## **Table of Contents**

**Figure S1:** Electron density maps of the fragment hits found by X-ray crystallography.

**Table S1:** Structures of fragments not included in SPR fragment screen.

**Table S2:** Structures of fragments not included in NMR fragment screen.

**Table S3:** Data Collection and Refinement Statistics.

**Table S4:** Data Collection and Refinement Statistics.

**Table S5:** Chemical Structures of the 96 fragments.

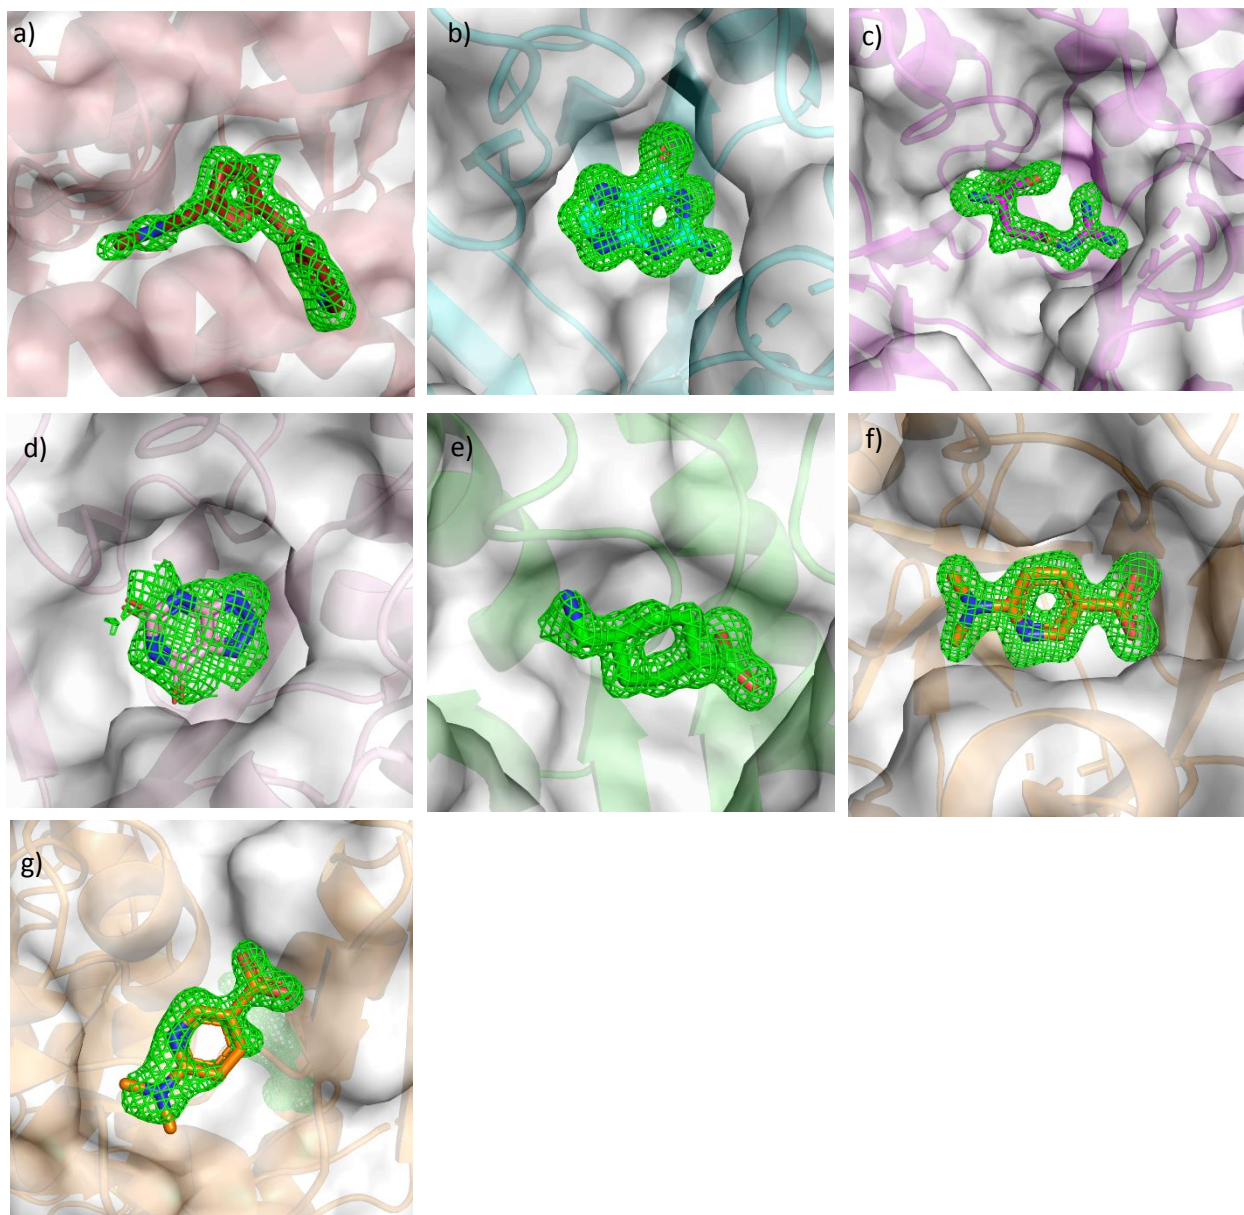

**Figure S1:** Electron density maps of the fragment hits found by X-ray crystallography in addition to the fragment coordinates a) J14, b) J64, c) J72, d) J79, e) J86, f) J14, pocket binder and g) J14, surface binder. The  $m|F_o| - |F_c|$  density map shown (green) is contoured at a sigma level of  $3\sigma$ .

**Table S1:** Structures of fragments not included in SPR fragment screen.

| Jena Plate ID | Fragment                                                                            | Jena Plate ID | Fragment                                                                              |
|---------------|-------------------------------------------------------------------------------------|---------------|---------------------------------------------------------------------------------------|
| J1            | 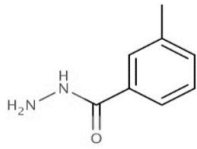   | J48           |    |
| J11           |    | J74           |    |
| J16           |    | J75           |    |
| J21           |   | J83           |   |
| J26           |  | J90           |  |
| J33           |  | J35           |  |
| J53           |  | J54           |  |
| J57           |  |               |                                                                                       |

**Table S2:** Structures of fragments not included in NMR fragment screen.

| Jena Plate ID | Fragment                                                                                | Jena Plate ID | Fragment                                                                             |
|---------------|-----------------------------------------------------------------------------------------|---------------|--------------------------------------------------------------------------------------|
| J2            | 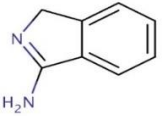       | J64           |   |
| J4            |        | J67           |   |
| J6            |        | J69           |   |
| J13           |        | J73           |   |
| J14           |       | J77           |  |
| J17           |      | J79           |  |
| J59           | HCl  | J82           |  |
| J35           |      | J53           |  |
| J54           |      | J55           |  |
| J57           |      |               |                                                                                      |

**Table S3:** Data Collection and Refinement Statistics

|                                                           |                            |                            |                            |
|-----------------------------------------------------------|----------------------------|----------------------------|----------------------------|
| PDB Code <sup>a</sup>                                     | 6FSO                       | 5SW3                       | 5N6F                       |
| Fragment Jena ID                                          | J14                        | J41                        | J64                        |
| <b>A) Data Collection and Processing</b>                  |                            |                            |                            |
| Wavelength                                                | 0.9184                     | 1.000                      | 0.9184                     |
| Beamline                                                  | BESSY BEAMLINE 14.1        | ELETTRA BEAMLINE 5.2R      | BESSY BEAMLINE 14.1        |
| Detector                                                  | PILATUS 6M                 | DECTRIS PILATUS 2M         | PILATUS 6M                 |
| Resolution range (Å)                                      | 43.29 - 1.45 (1.54 - 1.45) | 44.46 - 1.38 (1.46 - 1.38) | 44.28 - 1.12 (1.19 - 1.12) |
| Space group                                               | C 1 2 1                    | C 1 2 1                    | C 1 2 1                    |
| Unit cell parameters (a,b,c Å)                            | 90.9 64.9 70.8             | 89.0 64.1 70.5             | 88.7 64.9 70.7             |
| Unit cell parameters ( $\alpha, \beta, \gamma$ °)         | 90.0 95.7 90.0             | 90.0 92.8 90.0             | 90.0 93.4 90.0             |
| Matthews coefficient <sup>b</sup> Å <sup>3</sup> /Da)     | 2.5                        | 2.4                        | 2.5                        |
| Solvent content <sup>b</sup> (%)                          | 51.1                       | 49.4                       | 50.8                       |
| Total reflections                                         | 183142 (27068)             | 303178 (47561)             | 537838 (59077)             |
| Unique reflections                                        | 68249 (10718)              | 81197 (12961)              | 149008 (20548)             |
| Multiplicity                                              | 2.7                        | 3.7                        | 3.6                        |
| Completeness (%)                                          | 94.8 (92.3)                | 99.7 (98.9)                | 97.1 (83.2)                |
| Mean I/sigma(I)                                           | 9.8 (2.2)                  | 12.4 (2.5)                 | 10.3 (2.0)                 |
| Wilson B-factor (Å <sup>2</sup> )                         | 11.5                       | 13.6                       | 10.9                       |
| R-sym <sup>c</sup> (%)                                    | 7.3 (48.6)                 | 6.0 (49.3)                 | 6.1 (48.7)                 |
| R-meas (%)                                                | 9.0 (60.8)                 | 6.9 (57.7)                 | 7.1 (59.2)                 |
| CC1/2                                                     | 99.6 (76.3)                | 99.8 (79.7)                | 99.7 (72.0)                |
| <b>B) Refinement</b>                                      |                            |                            |                            |
| Resolution range (Å)                                      | 43.29 - 1.45               | 44.46 - 1.38               | 44.28 - 1.12               |
| Total reflections used in refinement                      | 68178                      | 81188                      | 148997                     |
| Reflections used for R-work                               | 64769                      | 77129                      | 141547                     |
| Reflections used for R-free                               | 3409                       | 4059                       | 7450                       |
| Final R value for R-work (%)                              | 16.6                       | 13.3                       | 13.6                       |
| Final R value for R-free (%)                              | 18.6                       | 16.2                       | 15.4                       |
| No. of Protein residues                                   | 368                        | 371                        | 365                        |
| No. of Water molecules                                    | 252                        | 223                        | 280                        |
| No. of Ligand molecules                                   | 1                          | 2                          | 1                          |
| No. of Other ligand molecules                             | 8                          | 6                          | 4                          |
| RMSD bond lengths (Å)                                     | 0.008                      | 0.007                      | 0.007                      |
| RMSD bond angles (°)                                      | 1.0                        | 0.9                        | 1.0                        |
| Ramachandran plot <sup>d</sup>                            |                            |                            |                            |
| Residues in most favored regions (%)                      | 93.9                       | 95                         | 96.1                       |
| Residues in additionally allowed regions (%)              | 5.4                        | 4.7                        | 3.6                        |
| Residues in generously allowed regions (%)                | 0.3                        | 0.3                        | 0.3                        |
| Residues in disallowed regions (%)                        | 0                          | 0                          | 0                          |
| Average B-factor all atoms <sup>e</sup> (Å <sup>2</sup> ) | 16.2                       | 17.9                       | 16.1                       |
| Protein main chain                                        | 13.4                       | 15.7                       | 13.7                       |
| Protein side chain                                        | 16.6                       | 18.2                       | 16.1                       |
| Protein all atoms                                         | 15.1                       | 17.0                       | 15.0                       |
| Ligand                                                    | 21.6                       | 30.1                       | 12.2                       |
| Water molecules                                           | 25.5                       | 26.4                       | 27.4                       |
| Other ligands                                             | 36.3                       | 36.3                       | 33.5                       |
| Number of TLS groups                                      | 6                          | N/A                        | N/A                        |

a) Statistics for the highest-resolution shell are shown in parenthesis, b) calculated with *Matthews\_coef* program from *CCP4* suite version 7.0.047<sup>1</sup>, c) calculated by the equation:  $(\text{SUM}(\text{ABS}(|(h,i)-l(h)|)))/(\text{SUM}(|(h,i)|))$  d) calculated with *PROCHECK*<sup>2</sup>, e) calculated with *MOLEMAN*<sup>3</sup>, f) other ligands include DMSO, PEG, Glycerol, 1PE, ACT, PG4, Zn.

**Table S4:** Data Collection and Refinement Statistics.

| PDB Code <sup>a</sup>                                     | 5UTI                       | 5UTJ                       | 5V3C                       |
|-----------------------------------------------------------|----------------------------|----------------------------|----------------------------|
| Fragment Jena ID                                          | J72                        | J79                        | J86                        |
| <b>A) Data Collection and Processing</b>                  |                            |                            |                            |
| Wavelength                                                | 1.000                      | 0.9184                     | 0.9184                     |
| Beamline                                                  | ELETTRA BEAMLINE 5.2R      | BESSY BEAMLINE 14.1        | BESSY BEAMLINE 14.1        |
| Detector                                                  | DECTRIS PILATUS 2M         | PILATUS 6M                 | PILATUS 6M                 |
| Resolution range (Å)                                      | 44.51 - 1.36 (1.44 - 1.36) | 44.50 - 1.55 (1.64 - 1.55) | 44.33 - 1.42 (1.51 - 1.42) |
| Space group                                               | C 1 2 1                    | C 1 2 1                    | C 1 2 1                    |
| Unit cell parameters (a,b,c Å)                            | 89.2 64.3 70.9             | 89.1 64.8 70.5             | 88.8 63.7 70.4             |
| Unit cell parameters (α, β, γ °)                          | 90.0 93.1 90.0             | 90.0 93.2 90.0             | 90.0 92.6 90.0             |
| Matthews coefficient <sup>b</sup> (Å <sup>3</sup> /Da)    | 2.5                        | 2.5                        | 2.4                        |
| Solvent Content <sup>b</sup> (%)                          | 50.1                       | 51.0                       | 48.8                       |
| Total reflections                                         | 239209 (38188)             | 219498 (34906)             | 276359 (43372)             |
| Unique reflections                                        | 81480 (12780)              | 58079 (9314)               | 73712 (11753)              |
| Multiplicity                                              | 2.9                        | 3.8                        | 3.8                        |
| Completeness (%)                                          | 95.0 (92.5)                | 99.7 (99.4)                | 99.4 (98.4)                |
| Mean I/sigma(I)                                           | 11.6 (2.3)                 | 15.4 (2.0)                 | 15.6 (2.0)                 |
| Wilson B-factor (Å <sup>2</sup> )                         | 15.4                       | 18.0                       | 15.7                       |
| R-sym <sup>c</sup> (%)                                    | 5.0 (44.5)                 | 5.2 (55.6)                 | 4.6 (55.1)                 |
| R-meas (%)                                                | 6.1 (54.2)                 | 6.0 (64.7)                 | 5.4 (64.3)                 |
| CC1/2                                                     | 99.8 (81.6)                | 99.9 (77.4)                | 99.9 (74.1)                |
| <b>B) Refinement</b>                                      |                            |                            |                            |
| Resolution range (Å)                                      | 44.51 - 1.36               | 44.50 - 1.55               | 44.33 - 1.42               |
| Total reflections used in refinement                      | 81466                      | 58069                      | 73705                      |
| Reflections used for R-work                               | 77393                      | 55166                      | 70020                      |
| Reflections used for R-free                               | 4073                       | 2903                       | 3685                       |
| Final R value for R-work (%)                              | 13.5                       | 14.7                       | 13.4                       |
| Final R value for R-free (%)                              | 15.8                       | 17.7                       | 15.5                       |
| No. of Protein residues                                   | 371                        | 364                        | 373                        |
| No. of Water molecules                                    | 269                        | 322                        | 359                        |
| No. of Ligand molecules                                   | 1                          | 1                          | 1                          |
| No. of Other ligand molecules                             | 4                          | 4                          | 6                          |
| RMSD bond lengths (Å)                                     | 0.007                      | 0.008                      | 0.007                      |
| RMSD bond angles (°)                                      | 0.9                        | 0.9                        | 0.9                        |
| Ramachandran plot <sup>d</sup>                            |                            |                            |                            |
| Residues in most favored regions (%)                      | 94.6                       | 94.2                       | 94                         |
| Residues in additionally allowed regions (%)              | 5                          | 5.5                        | 5.6                        |
| Residues in generously allowed regions (%)                | 0.3                        | 0.3                        | 0.3                        |
| Residues in disallowed regions (%)                        | 0                          | 0                          | 0                          |
| Average B-factor all atoms <sup>e</sup> (Å <sup>2</sup> ) | 20.5                       | 24.6                       | 22.1                       |
| Protein main chain                                        | 17.9                       | 22.1                       | 19.7                       |
| Protein side chain                                        | 20.9                       | 25.9                       | 22.5                       |
| Protein all atoms                                         | 19.5                       | 24.1                       | 21.1                       |
| Ligand                                                    | 27.1                       | 57.5                       | 26.8                       |
| Water molecules                                           | 29.8                       | 30.4                       | 31.2                       |
| Other ligands                                             | 44                         | 36.4                       | 46                         |
| Number of TLS groups                                      | N/A                        | N/A                        | N/A                        |

a) Statistics for the highest-resolution shell are shown in parenthesis, b) calculated with *Matthews\_coef* program from CCP4 suite version 7.0.047<sup>1</sup>, c) calculated by the equation:  $(\text{SUM}(\text{ABS}(\text{I}(\text{h},\text{i})-\text{I}(\text{h}))))/(\text{SUM}(\text{I}(\text{h},\text{i})))$  d) calculated with *PROCHECK*<sup>2</sup>, e) calculated with *MOLEMAN*<sup>3</sup>, f) other ligands include DMSO, PEG, Glycerol, 1PE, ACT, PG4, Zn.

**Table S5:** Chemical Structures of the 96 fragments. Marvin was used for displaying chemical structures, Marvin 6.3.1, 2014, ChemAxon (<http://www.chemaxon.com>) and the web server chemicalize.com

| Jena Plate ID | Fragment                                                                            | Jena Plate ID | Fragment                                                                            | Jena Plate ID | Fragment                                                                              |
|---------------|-------------------------------------------------------------------------------------|---------------|-------------------------------------------------------------------------------------|---------------|---------------------------------------------------------------------------------------|
| 1             | 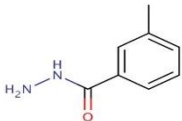   | 8             |    | 15            |    |
| 2             |    | 9             |    | 16            |    |
| 3             |   | 10            |   | 17            |   |
| 4             |  | 11            |  | 18            |  |
| 5             |  | 12            |  | 19            |  |
| 6             |  | 13            |  | 20            |  |
| 7             |  | 14            |  | 21            |  |



|    |                                                                                     |    |                                                                                     |    |                                                                                       |
|----|-------------------------------------------------------------------------------------|----|-------------------------------------------------------------------------------------|----|---------------------------------------------------------------------------------------|
| 22 | 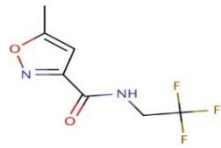   | 30 |    | 38 |    |
| 23 |    | 31 |    | 39 |    |
| 24 |    | 32 |    | 40 |    |
| 25 |    | 33 |    | 41 |    |
| 26 |  | 34 |  | 42 |  |
| 27 |  | 35 |  | 43 |  |
| 28 |  | 36 |  | 44 |  |
| 29 |  | 37 |  | 45 |  |

|    |  |    |  |    |  |
|----|--|----|--|----|--|
| 46 |  | 54 |  | 62 |  |
| 47 |  | 55 |  | 63 |  |
| 48 |  | 56 |  | 64 |  |
| 49 |  | 57 |  | 65 |  |
| 50 |  | 58 |  | 66 |  |
| 51 |  | 59 |  | 67 |  |
| 52 |  | 60 |  | 68 |  |
| 53 |  | 61 |  | 69 |  |

|    |  |    |  |    |  |
|----|--|----|--|----|--|
| 70 |  | 78 |  | 86 |  |
| 71 |  | 79 |  | 87 |  |
| 72 |  | 80 |  | 88 |  |
| 73 |  | 81 |  | 89 |  |
| 74 |  | 82 |  | 90 |  |
| 75 |  | 83 |  | 91 |  |
| 76 |  | 84 |  | 92 |  |
| 77 |  | 85 |  | 93 |  |

|                  |                                                                                                                                                                                                                                                                                               |                  |                                                                                                                                                                                                                                                                                                 |                  |                                                                                                                                                                                                                                                                        |
|------------------|-----------------------------------------------------------------------------------------------------------------------------------------------------------------------------------------------------------------------------------------------------------------------------------------------|------------------|-------------------------------------------------------------------------------------------------------------------------------------------------------------------------------------------------------------------------------------------------------------------------------------------------|------------------|------------------------------------------------------------------------------------------------------------------------------------------------------------------------------------------------------------------------------------------------------------------------|
| <p><b>94</b></p> | 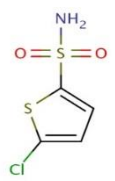 <p>Chemical structure of 4-chloro-5-sulfamoylthiophene. It consists of a thiophene ring with a chlorine atom at the 4-position and a sulfamoyl group (-SO<sub>2</sub>NH<sub>2</sub>) at the 5-position.</p> | <p><b>95</b></p> |  <p>Chemical structure of cyclopentanone oxime. It features a five-membered ring with an oxygen atom and a carbonyl group (=O) at the 1-position, which is converted to an oxime group (=N-H<sub>2</sub>).</p> | <p><b>96</b></p> |  <p>Chemical structure of bicyclo[2.2.1]heptan-2-one oxime. It shows a bicyclic system with a carbonyl group at the 2-position, which is converted to an oxime group (=N-H-OH).</p> |
|------------------|-----------------------------------------------------------------------------------------------------------------------------------------------------------------------------------------------------------------------------------------------------------------------------------------------|------------------|-------------------------------------------------------------------------------------------------------------------------------------------------------------------------------------------------------------------------------------------------------------------------------------------------|------------------|------------------------------------------------------------------------------------------------------------------------------------------------------------------------------------------------------------------------------------------------------------------------|
